# Supplementary material for: Impact of Serum Leptin to Adiponectin Ratio on Regression of Metabolic Syndrome in High-Risk Individuals: The ARIRANG Study
Source: PubMed Central journal article supplement — Yonsei Med J. 2017 Jan 16;58(2):339–46. doi: 10.3349/ymj.2017.58.2.339 (PMC5290013; doi:10.3349/ymj.2017.58.2.339), 2017-01-16
Supplement: ymj-58-339-s002.pdf [file ymj-58-339-s002.pdf]

**Supplementary Table 2.** ORs for New-Onset Metabolic Syndrome According to the Baseline L/A Ratio in 1610 Subjects without Metabolic Syndrome

|                                               | Serum L/A ratio |                  |                  | <i>p</i> for trend |
|-----------------------------------------------|-----------------|------------------|------------------|--------------------|
|                                               | Tertile 1       | Tertile 2        | Tertile 3        |                    |
| Men                                           |                 |                  |                  |                    |
| Serum L/A ratio, mg/g                         | <0.155          | 0.155–0.324      | ≥0.325           |                    |
| New-onset metabolic syndrome, n (%)           | 16 (7.2)        | 46 (20.6)        | 58 (26.1)        |                    |
| OR* (95% CI) for new-onset metabolic syndrome | 1.00            | 2.29 (1.20–4.35) | 2.33 (1.18–4.62) | 0.029              |
| Women                                         |                 |                  |                  |                    |
| Serum L/A ratio, mg/g                         | <0.441          | 0.441–0.853      | ≥0.854           |                    |
| New-onset metabolic syndrome, n (%)           | 38 (12.1)       | 50 (16.0)        | 75 (23.8)        |                    |
| OR* (95% CI) for new-onset metabolic syndrome | 1.00            | 1.76 (1.08–2.86) | 2.84 (1.75–4.63) | <0.001             |

L/A ratio, ratio of serum leptin to adiponectin; OR, odds ratio; CI, confidence interval; hs-CRP, high sensitivity-C reactive protein; HOMA-IR, homeostasis model assessment of insulin resistance.

\*Adjusted for age, smoking, alcohol consumption, regular exercise, baseline body mass index, hs-CRP, HOMA-IR, changes in body weight.
